# Supplementary material
Source: Springer Nature journal article supplement (https://www.springermedizin.de/resource/supplementary/12968_2010_976_MOESM2_ESM.pdf/9580080)

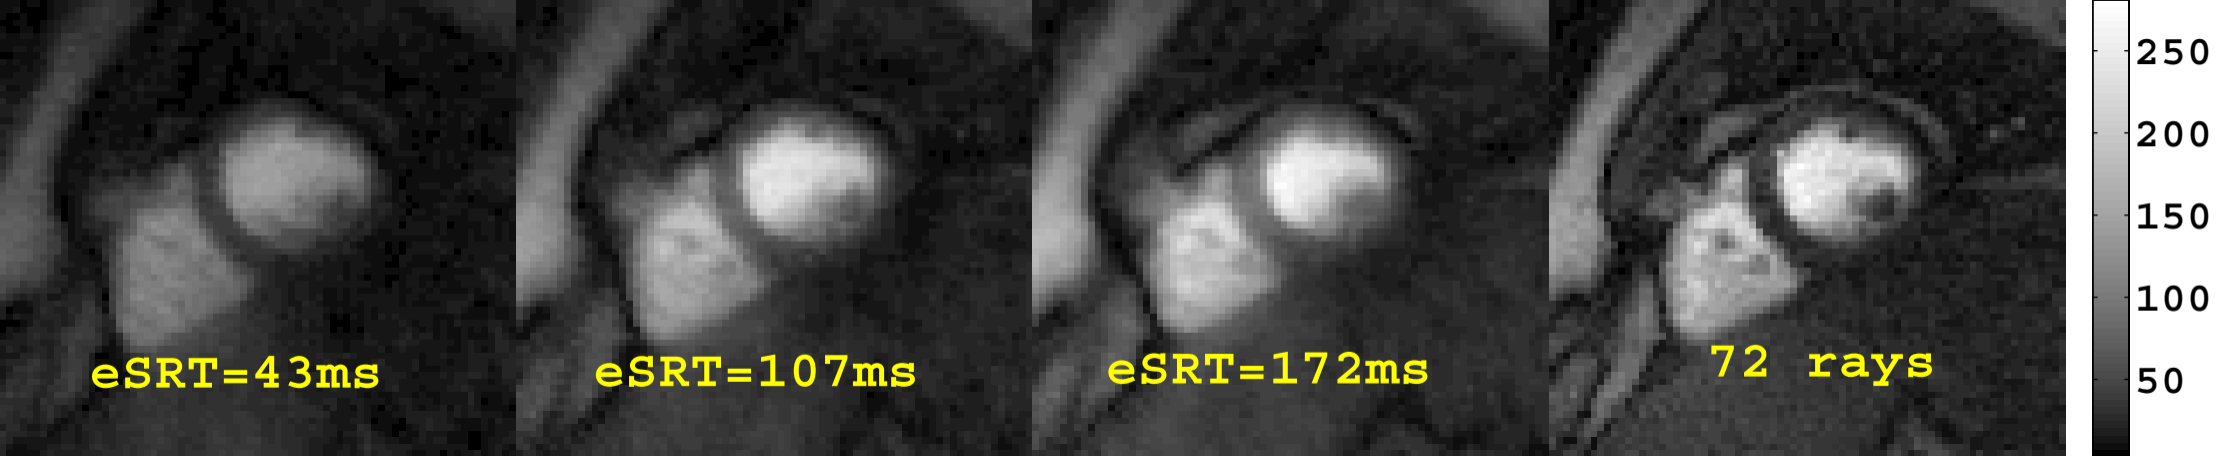

eSRT=43ms

eSRT=107ms

eSRT=172ms

72 rays

250

200

150

100

50

Supplement: MOESM2 [file 9580080]
